# Supplementary material for: Room temperature synthesis of coinage metal (Ag, Cu) chalcogenides
Source: Royal Society of Chemistry journal article supplement (doi:10.1039/b606681j), 2006-01-01
Supplement: b606681j.pdf [file b606681j.pdf]

## Electronic Supplementary materials

---

### Room temperature synthesis of coinage metal (Ag, Cu) chalcogenides

Snigdhamayee Praharaj, Sudip Nath, Sudipa Panigrahi, Soumen Basu, Sujit Kumar Ghosh, Surojit Pande, Subhra Jana and Tarasankar Pal\*

#### ESI 1. UV-vis spectra

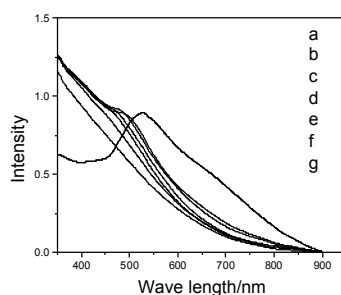

UV-vis spectra of formation of  $\text{Cu}_2\text{Se}$  (a) surface plasmon absorption band of Cu, (b) after mixing with Se and standing (c) 1 hr (d) 2 hr (e) 3 hr (f) 4 hr (g) 5 hr.

#### ESI 2. Photoluminescence spectra.

Photoluminescence spectra of  $\text{Ag}_2\text{Se}$  were recorded with an excitation wavelength of 370 nm at room temp. From the emission spectra at 535 nm the calculated band gap is 2.32 eV.

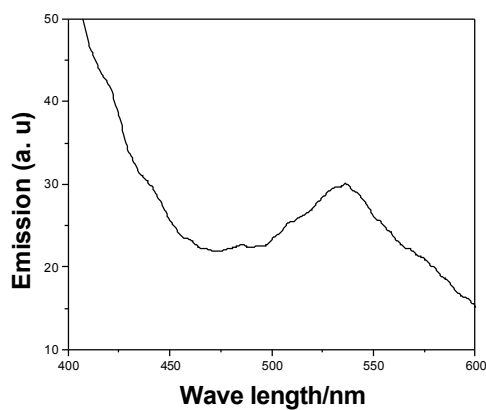

**ESI 3. X-ray diffraction pattern  $\text{Cu}_2\text{Se}$**

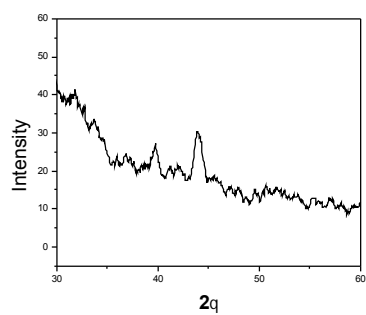

**ESI 4. TEM images**

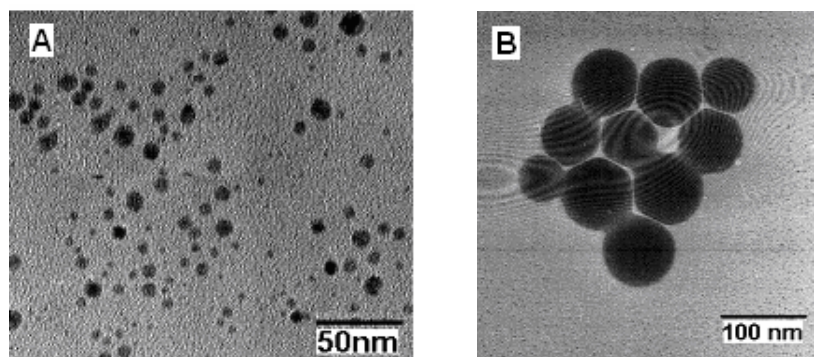

TEM images of (A) Ag (B) Se

**ESI 5. HRTEM image**

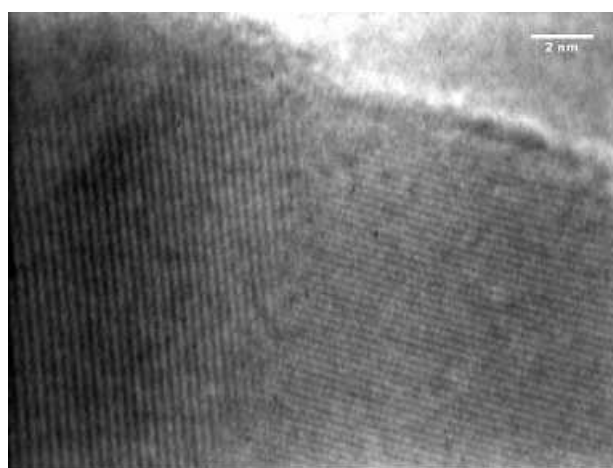

HRTEM image of  $\text{Ag}_2\text{Se}$  (3:1)

#### ESI 6. UV-vis spectra

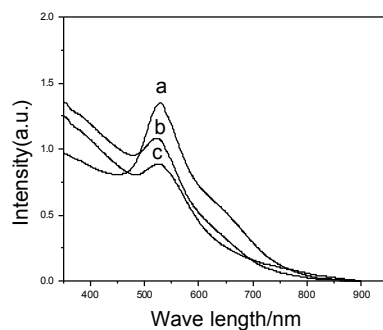

UV-vis spectra of gold selenium interaction (a) surface plasmon absorption band of Au, (b) after mixing with Se and (c) after standing the mixture for 5 hrs.

#### ESI 7. Effect of Heat.

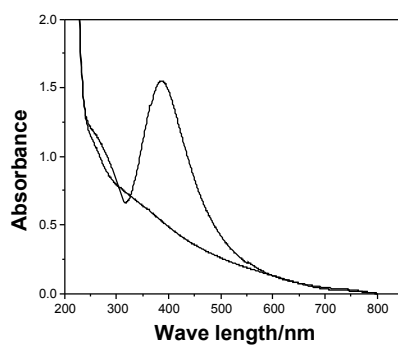

UV-vis spectra of the mixture of silver and selenium nanoparticles (a) before heating (b) after heating 30 mins.
